# Supplementary material for: Bioaccumulation of hexachlorobutadiene in pumpkin seedlings after waterborne exposure
Source: Royal Society of Chemistry journal article supplement (doi:10.1039/c7em00304h), 2017-01-01
Supplement: c7em00304h1.pdf [file c7em00304h1.pdf]

1

*Supporting Information*

2 **Bioaccumulation of Hexachlorobutadiene in Pumpkin**

3 **Seedlings after Waterborne Exposure**

4

5 Xingwang Hou<sup>1,2</sup>, Haiyan Zhang<sup>3</sup>, Yanlin Li<sup>1,4</sup>, Miao Yu<sup>1,2</sup>, Jiyan

6 Liu<sup>1,2\*</sup> and Guibin Jiang<sup>1,2</sup>

7

8 <sup>1</sup>State Key Laboratory of Environmental Chemistry and Ecotoxicology, Research Center for Eco-Environmental

9 Sciences, Chinese Academy of Sciences, P.O. Box 2871, Beijing 100085, China

10 <sup>2</sup> College of Resources and Environment, University of Chinese Academy of Sciences, Beijing 100049, China

11 <sup>3</sup> College of Environment, Zhejiang University of Technology, Hangzhou 310032, China

12 <sup>4</sup> School of Earth and Space Sciences, University of Science and Technology of China, Hefei 230026, China

13

14

15

16

17 \*Corresponding author

18 Tel: 8610-62849334

19 Fax: 8610-62849339

20 E-mail: [liujy@rcees.ac.cn](mailto:liujy@rcees.ac.cn)

21

22

23

24 **Table SI-1** The selected ions (m/z) of HCBd and its possible dechlorinated metabolites for GC-  
25 MS analysis.

| <b>Compound</b>      | <b>Formula</b>                                | <b>Quantitative Ion<br/>(m/z)</b> | <b>Qualitative Ions<br/>(m/z)</b> |
|----------------------|-----------------------------------------------|-----------------------------------|-----------------------------------|
| HCBD                 | C <sub>4</sub> Cl <sub>6</sub>                | 225                               | 223                               |
| <sup>13</sup> C-HCBD | <sup>13</sup> C <sub>4</sub> Cl <sub>6</sub>  | 231                               | 233                               |
| Penta-CBD            | C <sub>4</sub> HCl <sub>5</sub>               | 191                               | 189, 193                          |
| Tetra-CBD            | C <sub>4</sub> H <sub>2</sub> Cl <sub>4</sub> | 155                               | 190, 192                          |
| Tri-CBD              | C <sub>4</sub> H <sub>3</sub> Cl <sub>3</sub> | 121                               | 156, 158                          |

26

27 **Table SI-2.** The final mass distribution and total recoveries of HCBd in exposure systems in  
28 which HCBd was spiked in the beginning of the exposure experiment, and the solutions were not  
29 renewed during the 10-day exposure.

| Leaf (ng)              | Stem (ng)   | Root (ng) | Solution (ng) | Spiking<br>amount<br>(ng) | Total<br>recovery (%) |
|------------------------|-------------|-----------|---------------|---------------------------|-----------------------|
| 1.4 ± 0.2 <sup>a</sup> | 0.79 ± 0.09 | 37 ± 9    | 10 ± 8        | 4500                      | 1.2 ± 0.1             |

30 <sup>a</sup> Mean value ± standard deviation (n ≥ 3)

31

32

33

34

35 **Table SI-3** HCBD concentrations in different compartments in blank plant controls.

| Day of<br>sampling | Leaf (ng/g)            | Stem (ng/g) | Root (ng/g) | Solution<br>(ng/mL) |
|--------------------|------------------------|-------------|-------------|---------------------|
| 1                  | 6.5 ± 4.7 <sup>a</sup> | 12 ± 6      | 7.0 ± 1.9   | 0.026 ± 0.018       |
| 2                  | 6.6 ± 6.0              | 15 ± 13     | 9.2 ± 1.1   | 0.038 ± 0.044       |
| 3                  | 3.3 ± 0.8              | 5.7 ± 1.4   | 12 ± 6      | 0.042 ± 0.051       |
| 4                  | 5.0 ± 1.0              | 6.7 ± 2.2   | 11 ± 1      | 0.040 ± 0.017       |
| 5                  | 6.4 ± 3.6              | 6.9 ± 1.9   | 13 ± 3      | 0.038 ± 0.021       |
| 7                  | 4.8 ± 1.6              | 6.2 ± 1.1   | 14 ± 6      | 0.034 ± 0.011       |
| 11                 | 4.6 ± 0.5              | 6.1 ± 1.1   | 15 ± 2      | 0.055 ± 0.037       |
| 15                 | 3.0 ± 1.4              | 5.1 ± 0.2   | 13 ± 2      | 0.046 ± 0.010       |

36 <sup>a</sup> Mean value ± standard deviation (n ≥ 3)

37

38

39

40

41

42

43

44

45

46

47 **Table SI-4.** HCBD concentrations in different compartments in exposure groups.

| Day of sampling | Leaf (ng/g)          | Stem (ng/g) | Root (ng/g)    | Solution (ng/mL) |
|-----------------|----------------------|-------------|----------------|------------------|
| 1               | 28 ± 10 <sup>a</sup> | 329 ± 398   | 10453 ± 431    | 7.8 ± 0.4        |
| 2               | 20 ± 3               | 423 ± 31    | 21564 ± 4784   | 15 ± 3           |
| 3               | 59 ± 9               | 504 ± 57    | 36760 ± 5091   | 19 ± 2           |
| 4               | 55 ± 19              | 452 ± 257   | 40846 ± 9113   | 20 ± 1           |
| 5               | 33 ± 14              | 602 ± 342   | 28324 ± 4846   | 18 ± 1           |
| 6               |                      |             |                | 21 ± 1           |
| 7               | 25 ± 9               | 576 ± 288   | 52578 ± 11577  | 25 ± 3           |
| 8               |                      |             |                | 15 ± 3           |
| 9               |                      |             |                | 21 ± 2           |
| 10              |                      |             |                | 20 ± 2           |
| 11              | 25 ± 9               | 1364 ± 461  | 89835 ± 4610   | 19 ± 3           |
| 12              |                      |             |                | 17 ± 1           |
| 13              |                      |             |                | 21 ± 5           |
| 14              |                      |             |                | 23 ± 4           |
| 15              | 36 ± 2               | 1289 ± 382  | 116287 ± 17416 | 24 ± 9           |

48 <sup>a</sup> Mean value ± standard deviation (n ≥ 3)

49

50

51

52

53 **Table SI-5.** Mass balance of HCBD in the hydroponic exposure experiment on day 15.

| Leaf (ng)       | Stem (ng)  | Root (ng)          | Solution<br>(ng)   | Volatilization<br>(ng) | Spiking<br>amount<br>(ng) | Total<br>recovery<br>(%) |
|-----------------|------------|--------------------|--------------------|------------------------|---------------------------|--------------------------|
| $8.6 \pm 0.3^a$ | $52 \pm 5$ | $3291 \pm$<br>1404 | $12904 \pm$<br>232 | $46665 \pm$<br>3495    | 67500                     | $93 \pm 3$               |

54 <sup>a</sup> Mean value  $\pm$  standard deviation ( $n \geq 3$ )

55

56

57

58

59
